# Supplementary material for: Design of a custom-made device for real-time optical measurement of differential mineral concentrations in three-dimensional scaffolds for bone tissue engineering
Source: PubMed Central journal article supplement (PMC8753176; doi:10.1098/rsos.210791), 2022-01-12
Supplement: rsos210791_review_history.pdf [file rsos210791_review_history.pdf]

## **Design of a custom-made device for real-time optical measurement of differential mineral concentrations in three-dimensional scaffolds for bone tissue engineering**

J. Lovecchio, V. Betti, M. Cortesi, E. Ravagli, S. Severi and E. Giordano

### **Article citation details**

*R. Soc. open sci.* **8**: 210791.

<http://dx.doi.org/10.1098/rsos.210791>

### **Review timeline**

|                         |                  |
|-------------------------|------------------|
| Original submission:    | 26 May 2021      |
| 1st revised submission: | 4 October 2021   |
| 2nd revised submission: | 10 November 2021 |
| Final acceptance:       | 29 November 2021 |

Note: Reports are unedited and appear as submitted by the referee. The review history appears in chronological order.

## Review History

### RSOS-210791.R0 (Original submission)

#### Review form: Reviewer 1

**Is the manuscript scientifically sound in its present form?**

No

**Are the interpretations and conclusions justified by the results?**

Yes

**Is the language acceptable?**

Yes

**Do you have any ethical concerns with this paper?**

No

**Have you any concerns about statistical analyses in this paper?**

No

**Recommendation?**

Major revision is needed (please make suggestions in comments)

**Comments to the Author(s)**

This study is potentially significant as it explores the reliability of “a miniaturized and inexpensive custom-made spectrometer device” for measuring differential amounts of a calcium salt in an alginate hydrogel. This system would enable a “real-time, in-line, in situ analysis,” that could be used in tissue engineering studies (e.g., non-destructive characterization of the mineral content in polymeric scaffolds, bioreactor systems, etc.). The following comments have been provided for the authors’ consideration and could improve the manuscript.

1) Page 2: The introduction is very brief. Some background information on the current state of the art and a comparison with similar studies reported by others would be helpful to readers.

2) Page 3: The suppliers of all chemicals should be identified. This includes RPMI, used under “3D Alginate Hydrogel scaffolds”. Also, letters “A” and “T” in Eq. 1 should be defined.

3) Page 3: The information provided under “Custom-made spectrometer device development and measurements” may not be adequate for a reader to replicate the study and build the device. Additional details and a more descriptive image (Figure 1) would be necessary.

4) Page 10 and Figure 8: According to the manuscript, the stability of the “measurement method is evidenced when the validated custom-made spectrometer is used to evaluate the differential amounts of calcium salt in the alginate hydrogel scaffolds at different days.” Unlike the previous results (Figures 3 – 7), Figure 8 only shows the results of the custom-made device. It would be desirable to see the results at the different time points coming from the commercial device.

5) Page 11: The manuscript shows a short paragraph at the end, summarizing the observations of this study. Nevertheless, it would be important to have distinct sections for the discussion and/or conclusions, including an overview of the limitations, future directions, and additional potential applications beyond the results shown in this study.

6) The manuscript does not show any image of the hydrogels prepared in this study (neither optical nor scanning electron microscopy).

7) Overall, the manuscript is short. Additional characterizations using a different technique to demonstrate a uniform distribution of the calcium salt within these hydrogels seem to be essential for this study.

**Review form: Reviewer 2**

**Is the manuscript scientifically sound in its present form?**

Yes

**Are the interpretations and conclusions justified by the results?**

Yes

**Is the language acceptable?**

Yes

**Do you have any ethical concerns with this paper?**

No

**Have you any concerns about statistical analyses in this paper?**

No

**Recommendation?**

Accept with minor revision (please list in comments)

**Comments to the Author(s)**

The article is well designed and written. Please make the following corrections before accepting

1. Summarize the article abstract in one paragraph
2. Find out more about the calcium phosphate family. You can get help from the following sources: <https://doi.org/10.1016/j.bsecv.2020.05.001>, <https://doi.org/10.1016/j.bsecv.2017.05.001>
3. More details are needed about hydrogels and gels. You can get help from the following sources: <https://doi.org/10.1016/j.matchemphys.2019.122305>, <https://doi.org/10.1021/acsbio materials.9b01689>
4. Explain Equation 1 further and clarify what each parameter specifies.
5. If possible, take a few microscopic images of the scaffolds and add them to the manuscript
6. The number of references is too low, please add more studies

**Decision letter (RSOS-210791.R0)**

We hope you are keeping well at this difficult and unusual time. We continue to value your support of the journal in these challenging circumstances. If Royal Society Open Science can assist you at all, please don't hesitate to let us know at the email address below.

Dear Dr Lovecchio

The Editors assigned to your paper RSOS-210791 "Design of a custom-made device for real-time optical measurement of differential mineral concentrations in 3D scaffolds for bone tissue engineering" have now received comments from reviewers and would like you to revise the paper in accordance with the reviewer comments and any comments from the Editors. Please note this decision does not guarantee eventual acceptance.

We invite you to respond to the comments supplied below and revise your manuscript. Below the referees' and Editors' comments (where applicable) we provide additional requirements. Final acceptance of your manuscript is dependent on these requirements being met. We provide guidance below to help you prepare your revision.

We do not generally allow multiple rounds of revision so we urge you to make every effort to fully address all of the comments at this stage. If deemed necessary by the Editors, your manuscript will be sent back to one or more of the original reviewers for assessment. If the original reviewers are not available, we may invite new reviewers.

Please submit your revised manuscript and required files (see below) no later than 21 days from today's (ie 08-Sep-2021) date. Note: the ScholarOne system will 'lock' if submission of the revision is attempted 21 or more days after the deadline. If you do not think you will be able to meet this deadline please contact the editorial office immediately.

Please note article processing charges apply to papers accepted for publication in Royal Society Open Science (<https://royalsocietypublishing.org/rsos/charges>). Charges will also apply to papers transferred to the journal from other Royal Society Publishing journals, as well as papers submitted as part of our collaboration with the Royal Society of Chemistry (<https://royalsocietypublishing.org/rsos/chemistry>). Fee waivers are available but must be requested when you submit your revision (<https://royalsocietypublishing.org/rsos/waivers>).

Thank you for submitting your manuscript to Royal Society Open Science and we look forward to receiving your revision. If you have any questions at all, please do not hesitate to get in touch.

Kind regards,  
Royal Society Open Science Editorial Office  
Royal Society Open Science  
[openscience@royalsociety.org](mailto:openscience@royalsociety.org)

on behalf of Dr Peter Munro (Associate Editor) and R. Kerry Rowe (Subject Editor)  
[openscience@royalsociety.org](mailto:openscience@royalsociety.org)

Associate Editor Comments to Author (Dr Peter Munro):

Associate Editor: 1

Comments to the Author:

The reviewers have raised a number of queries which should be addressed before this manuscript can be published.

Reviewer comments to Author:

Reviewer: 1

Comments to the Author(s)

This study is potentially significant as it explores the reliability of “a miniaturized and inexpensive custom-made spectrometer device” for measuring differential amounts of a calcium salt in an alginate hydrogel. This system would enable a “real-time, in-line, in situ analysis,” that could be used in tissue engineering studies (e.g., non-destructive characterization of the mineral content in polymeric scaffolds, bioreactor systems, etc.). The following comments have been provided for the authors’ consideration and could improve the manuscript.

1) Page 2: The introduction is very brief. Some background information on the current state of the art and a comparison with similar studies reported by others would be helpful to readers.

2) Page 3: The suppliers of all chemicals should be identified. This includes RPMI, used under “3D Alginate Hydrogel scaffolds”. Also, letters “A” and “T” in Eq. 1 should be defined.

3) Page 3: The information provided under “Custom-made spectrometer device development and measurements” may not be adequate for a reader to replicate the study and build the device. Additional details and a more descriptive image (Figure 1) would be necessary.

4) Page 10 and Figure 8: According to the manuscript, the stability of the “measurement method is evidenced when the validated custom-made spectrometer is used to evaluate the differential amounts of calcium salt in the alginate hydrogel scaffolds at different days.” Unlike the previous results (Figures 3 – 7), Figure 8 only shows the results of the custom-made device. It would be desirable to see the results at the different time points coming from the commercial device.

- 5) Page 11: The manuscript shows a short paragraph at the end, summarizing the observations of this study. Nevertheless, it would be important to have distinct sections for the discussion and/or conclusions, including an overview of the limitations, future directions, and additional potential applications beyond the results shown in this study.
- 6) The manuscript does not show any image of the hydrogels prepared in this study (neither optical nor scanning electron microscopy).
- 7) Overall, the manuscript is short. Additional characterizations using a different technique to demonstrate a uniform distribution of the calcium salt within these hydrogels seem to be essential for this study.

Reviewer: 2

Comments to the Author(s)

The article is well designed and written. Please make the following corrections before accepting

1. Summarize the article abstract in one paragraph
2. Find out more about the calcium phosphate family. You can get help from the following sources: <https://doi.org/10.1016/j.bsecv.2020.05.001>, <https://doi.org/10.1016/j.bsecv.2017.05.001>
3. More details are needed about hydrogels and gels. You can get help from the following sources: <https://doi.org/10.1016/j.matchemphys.2019.122305>, <https://doi.org/10.1021/acsbio.2019.01689>
4. Explain Equation 1 further and clarify what each parameter specifies.
5. If possible, take a few microscopic images of the scaffolds and add them to the manuscript
6. The number of references is too low, please add more studies

===PREPARING YOUR MANUSCRIPT===

Your revised paper should include the changes requested by the referees and Editors of your manuscript. You should provide two versions of this manuscript and both versions must be provided in an editable format:

one version identifying all the changes that have been made (for instance, in coloured highlight, in bold text, or tracked changes);

a 'clean' version of the new manuscript that incorporates the changes made, but does not highlight them. This version will be used for typesetting if your manuscript is accepted.

Please ensure that any equations included in the paper are editable text and not embedded images.

Please ensure that you include an acknowledgements' section before your reference list/bibliography. This should acknowledge anyone who assisted with your work, but does not qualify as an author per the guidelines at <https://royalsociety.org/journals/ethics-policies/openness/>.

While not essential, it will speed up the preparation of your manuscript proof if accepted if you format your references/bibliography in Vancouver style (please see <https://royalsociety.org/journals/authors/author-guidelines/#formatting>). You should include DOIs for as many of the references as possible.

If you have been asked to revise the written English in your submission as a condition of publication, you must do so, and you are expected to provide evidence that you have received language editing support. The journal would prefer that you use a professional language editing

service and provide a certificate of editing, but a signed letter from a colleague who is a native speaker of English is acceptable. Note the journal has arranged a number of discounts for authors using professional language editing services (<https://royalsociety.org/journals/authors/benefits/language-editing/>).

#### ===PREPARING YOUR REVISION IN SCHOLARONE===

To revise your manuscript, log into <https://mc.manuscriptcentral.com/rsos> and enter your Author Centre - this may be accessed by clicking on "Author" in the dark toolbar at the top of the page (just below the journal name). You will find your manuscript listed under "Manuscripts with Decisions". Under "Actions", click on "Create a Revision".

Attach your point-by-point response to referees and Editors at Step 1 'View and respond to decision letter'. This document should be uploaded in an editable file type (.doc or .docx are preferred). This is essential.

Please ensure that you include a summary of your paper at Step 2 'Type, Title, & Abstract'. This should be no more than 100 words to explain to a non-scientific audience the key findings of your research. This will be included in a weekly highlights email circulated by the Royal Society press office to national UK, international, and scientific news outlets to promote your work.

At Step 3 'File upload' you should include the following files:

-- Your revised manuscript in editable file format (.doc, .docx, or .tex preferred). You should upload two versions:

- 1) One version identifying all the changes that have been made (for instance, in coloured highlight, in bold text, or tracked changes);
- 2) A 'clean' version of the new manuscript that incorporates the changes made, but does not highlight them.

-- An individual file of each figure (EPS or print-quality PDF preferred [either format should be produced directly from original creation package], or original software format).

-- An editable file of each table (.doc, .docx, .xls, .xlsx, or .csv).

-- An editable file of all figure and table captions.

Note: you may upload the figure, table, and caption files in a single Zip folder.

-- Any electronic supplementary material (ESM).

-- If you are requesting a discretionary waiver for the article processing charge, the waiver form must be included at this step.

-- If you are providing image files for potential cover images, please upload these at this step, and inform the editorial office you have done so. You must hold the copyright to any image provided.

-- A copy of your point-by-point response to referees and Editors. This will expedite the preparation of your proof.

At Step 6 'Details & comments', you should review and respond to the queries on the electronic submission form. In particular, we would ask that you do the following:

-- Ensure that your data access statement meets the requirements at

<https://royalsociety.org/journals/authors/author-guidelines/#data>. You should ensure that you cite the dataset in your reference list. If you have deposited data etc in the Dryad repository, please include both the 'For publication' link and 'For review' link at this stage.

-- If you are requesting an article processing charge waiver, you must select the relevant waiver option (if requesting a discretionary waiver, the form should have been uploaded at Step 3 'File upload' above).

-- If you have uploaded ESM files, please ensure you follow the guidance at <https://royalsociety.org/journals/authors/author-guidelines/#supplementary-material> to include a suitable title and informative caption. An example of appropriate titling and captioning

may be found at [https://figshare.com/articles/Table\\_S2\\_from\\_Is\\_there\\_a\\_trade-off\\_between\\_peak\\_performance\\_and\\_performance\\_breadth\\_across\\_temperatures\\_for\\_aerobic\\_sc\\_ope\\_in\\_teleost\\_fishes\\_/3843624](https://figshare.com/articles/Table_S2_from_Is_there_a_trade-off_between_peak_performance_and_performance_breadth_across_temperatures_for_aerobic_sc_ope_in_teleost_fishes_/3843624).

At Step 7 'Review & submit', you must view the PDF proof of the manuscript before you will be able to submit the revision. Note: if any parts of the electronic submission form have not been completed, these will be noted by red message boxes.

## Author's Response to Decision Letter for (RSOS-210791.R0)

See Appendix A.

## RSOS-210791.R1 (Revision)

### Review form: Reviewer 1

**Is the manuscript scientifically sound in its present form?**

Yes

**Are the interpretations and conclusions justified by the results?**

Yes

**Is the language acceptable?**

Yes

**Do you have any ethical concerns with this paper?**

No

**Have you any concerns about statistical analyses in this paper?**

No

#### **Recommendation?**

Accept with minor revision (please list in comments)

#### **Comments to the Author(s)**

The manuscript has been adequately revised to address the concerns raised by the reviewers. Nevertheless, the authors are encouraged to proof-read their revised manuscript before resubmission. Some corrections are necessary before consideration by the journal. Here are some examples:

1) Page 2: In the following sentence, “[Ref]” appears to be a place-holder for a missing reference number, or it is possibly a typographical error.

This test conveniently reports about bone mineral content (BMC) and density (BMD) in patients, although requiring dedicated expensive and bulky instruments [Ref] inappropriate for a cellular study in a laboratory.

2) Page 2: Likewise, it is unclear if “[Vanderoost 14]” in the following sentence is a reference citation, which seems to be in an unusual format:

Among those, X-ray uCT was demonstrated as a powerful non-destructive imaging technique to obtain, with the highest resolution, precise quantitative and qualitative information on the bone tissue microstructure again, without the need for conventional destructive methods [Vanderoost 14].

3) Table 1: The table caption should be placed above the table.

4) Figure 9: The caption does not clearly describe the two graphs. It is unclear which graph the caption is referring to. These graphs should contain labels (a, b) and a distinctive caption for each. According to the authors’ response to reviewers, one of the graphs is presenting the newly-added results, but the caption has not been updated accordingly. The response to reviewers states “We added in old Figure 8 (now Figure 9, left panel) the results collected with the commercial device at the different time points. Results from the custom-made device appear in the right panel of this same Figure.”

5) Page 11: The following sentence should be a part of the previous paragraph or the next paragraph. It is currently showing as a single-sentence paragraph. “A single wavelength (690nm) was identified aiming at simplify any subsequent analysis.” In addition, this sentence needs to be rephrased (“aiming at simplify” is unclear).

6) Page 12: The same issue can be seen under Conclusion. There are three single-sentenced paragraphs under this section.

## Review form: Reviewer 2

**Is the manuscript scientifically sound in its present form?**

Yes

**Are the interpretations and conclusions justified by the results?**

Yes

**Is the language acceptable?**

Yes

**Do you have any ethical concerns with this paper?**

No

**Have you any concerns about statistical analyses in this paper?**

No

**Recommendation?**

Accept as is

**Comments to the Author(s)**

Accept



## Decision letter (RSOS-210791.R1)

We hope you are keeping well at this difficult and unusual time. We continue to value your support of the journal in these challenging circumstances. If Royal Society Open Science can assist you at all, please don't hesitate to let us know at the email address below.

Dear Dr Lovecchio

On behalf of the Editors, we are pleased to inform you that your Manuscript RSOS-210791.R1 "Design of a custom-made device for real-time optical measurement of differential mineral concentrations in 3D scaffolds for bone tissue engineering" has been accepted for publication in Royal Society Open Science subject to minor revision in accordance with the referees' reports. Please find the referees' comments along with any feedback from the Editors below my signature.

We invite you to respond to the comments and revise your manuscript. Below the referees' and Editors' comments (where applicable) we provide additional requirements. Final acceptance of your manuscript is dependent on these requirements being met. We provide guidance below to help you prepare your revision.

Please submit your revised manuscript and required files (see below) no later than 7 days from today's (ie 29-Oct-2021) date. Note: the ScholarOne system will 'lock' if submission of the revision is attempted 7 or more days after the deadline. If you do not think you will be able to meet this deadline please contact the editorial office immediately.

Please note article processing charges apply to papers accepted for publication in Royal Society Open Science (<https://royalsocietypublishing.org/rsos/charges>). Charges will also apply to papers transferred to the journal from other Royal Society Publishing journals, as well as papers submitted as part of our collaboration with the Royal Society of Chemistry (<https://royalsocietypublishing.org/rsos/chemistry>). Fee waivers are available but must be requested when you submit your revision (<https://royalsocietypublishing.org/rsos/waivers>).

Thank you for submitting your manuscript to Royal Society Open Science and we look forward to receiving your revision. If you have any questions at all, please do not hesitate to get in touch.

Kind regards,  
Royal Society Open Science Editorial Office  
Royal Society Open Science  
[openscience@royalsociety.org](mailto:openscience@royalsociety.org)

on behalf of Dr Peter Munro (Associate Editor) and R. Kerry Rowe (Subject Editor)  
[openscience@royalsociety.org](mailto:openscience@royalsociety.org)

Associate Editor Comments to Author (Dr Peter Munro):

Thank you for revising your manuscript. I am pleased to recommend that this paper be published once minor revisions raised by Reviewer 2 have been addressed.

Reviewer comments to Author:

Reviewer: 1

Comments to the Author(s)

The manuscript has been adequately revised to address the concerns raised by the reviewers. Nevertheless, the authors are encouraged to proof-read their revised manuscript before

resubmission. Some corrections are necessary before consideration by the journal. Here are some examples:

1) Page 2: In the following sentence, “[Ref]” appears to be a place-holder for a missing reference number, or it is possibly a typographical error.

This test conveniently reports about bone mineral content (BMC) and density (BMD) in patients, although requiring dedicated expensive and bulky instruments [Ref] inappropriate for a cellular study in a laboratory.

2) Page 2: Likewise, it is unclear if “[Vanderoost 14]” in the following sentence is a reference citation, which seems to be in an unusual format:

Among those, X-ray uCT was demonstrated as a powerful non-destructive imaging technique to obtain, with the highest resolution, precise quantitative and qualitative information on the bone tissue microstructure again, without the need for conventional destructive methods [Vanderoost 14].

3) Table 1: The table caption should be placed above the table.

4) Figure 9: The caption does not clearly describe the two graphs. It is unclear which graph the caption is referring to. These graphs should contain labels (a, b) and a distinctive caption for each. According to the authors’ response to reviewers, one of the graphs is presenting the newly-added results, but the caption has not been updated accordingly. The response to reviewers states “We added in old Figure 8 (now Figure 9, left panel) the results collected with the commercial device at the different time points. Results from the custom-made device appear in the right panel of this same Figure.”

5) Page 11: The following sentence should be a part of the previous paragraph or the next paragraph. It is currently showing as a single-sentence paragraph. “A single wavelength (690nm) was identified aiming at simplify any subsequent analysis.” In addition, this sentence needs to be rephrased (“aiming at simplify” is unclear).

6) Page 12: The same issue can be seen under Conclusion. There are three single-sentenced paragraphs under this section.

Reviewer: 2

Comments to the Author(s)

Accept

===PREPARING YOUR MANUSCRIPT===

Your revised paper should include the changes requested by the referees and Editors of your manuscript.

You should provide two versions of this manuscript and both versions must be provided in an editable format:

one version should clearly identify all the changes that have been made (for instance, in coloured highlight, in bold text, or tracked changes);

a 'clean' version of the new manuscript that incorporates the changes made, but does not highlight them. This version will be used for typesetting.

Please ensure that any equations included in the paper are editable text and not embedded images.

Please ensure that you include an acknowledgements' section before your reference list/bibliography. This should acknowledge anyone who assisted with your work, but does not qualify as an author per the guidelines at <https://royalsociety.org/journals/ethics-policies/openness/>.

While not essential, it will speed up the preparation of your manuscript proof if you format your references/bibliography in Vancouver style (please see <https://royalsociety.org/journals/authors/author-guidelines/#formatting>). You should include DOIs for as many of the references as possible.

If you have been asked to revise the written English in your submission as a condition of publication, you must do so, and you are expected to provide evidence that you have received language editing support. The journal would prefer that you use a professional language editing service and provide a certificate of editing, but a signed letter from a colleague who is a proficient user of English is acceptable. Note the journal has arranged a number of discounts for authors using professional language editing services (<https://royalsociety.org/journals/authors/benefits/language-editing/>).

#### ===PREPARING YOUR REVISION IN SCHOLARONE===

To revise your manuscript, log into <https://mc.manuscriptcentral.com/rsos> and enter your Author Centre - this may be accessed by clicking on "Author" in the dark toolbar at the top of the page (just below the journal name). You will find your manuscript listed under "Manuscripts with Decisions". Under "Actions", click on "Create a Revision".

Attach your point-by-point response to referees and Editors at the 'View and respond to decision letter' step. This document should be uploaded in an editable file type (.doc or .docx are preferred). This is essential, and your manuscript will be returned to you if you do not provide it.

Please ensure that you include a summary of your paper at the 'Type, Title, & Abstract' step. This should be no more than 100 words to explain to a non-scientific audience the key findings of your research. This will be included in a weekly highlights email circulated by the Royal Society press office to national UK, international, and scientific news outlets to promote your work. An effective summary can substantially increase the readership of your paper.

At the 'File upload' step you should include the following files:

-- Your revised manuscript in editable file format (.doc, .docx, or .tex preferred). You should upload two versions:

1) One version identifying all the changes that have been made (for instance, in coloured highlight, in bold text, or tracked changes);

2) A 'clean' version of the new manuscript that incorporates the changes made, but does not highlight them.

-- An individual file of each figure (EPS or print-quality PDF preferred [either format should be produced directly from original creation package], or original software format).

-- An editable file of each table (.doc, .docx, .xls, .xlsx, or .csv).

-- An editable file of all figure and table captions.

Note: you may upload the figure, table, and caption files in a single Zip folder.

-- Any electronic supplementary material (ESM).

-- If you are requesting a discretionary waiver for the article processing charge, the waiver form must be included at this step.

- If you are providing image files for potential cover images, please upload these at this step, and inform the editorial office you have done so. You must hold the copyright to any image provided.
- A copy of your point-by-point response to referees and Editors. This will expedite the preparation of your proof.

At the 'Details & comments' step, you should review and respond to the queries on the electronic submission form. In particular, we would ask that you do the following:

- Ensure that your data access statement meets the requirements at <https://royalsociety.org/journals/authors/author-guidelines/#data>. You should ensure that you cite the dataset in your reference list. If you have deposited data etc in the Dryad repository, please only include the 'For publication' link at this stage. You should remove the 'For review' link.
- If you are requesting an article processing charge waiver, you must select the relevant waiver option (if requesting a discretionary waiver, the form should have been uploaded, see 'File upload' above).
- If you have uploaded any electronic supplementary (ESM) files, please ensure you follow the guidance at <https://royalsociety.org/journals/authors/author-guidelines/#supplementary-material> to include a suitable title and informative caption. An example of appropriate titling and captioning may be found at [https://figshare.com/articles/Table\\_S2\\_from\\_Is\\_there\\_a\\_trade-off\\_between\\_peak\\_performance\\_and\\_performance\\_breadth\\_across\\_temperatures\\_for\\_aerobic\\_scope\\_in\\_teleost\\_fishes\\_/3843624](https://figshare.com/articles/Table_S2_from_Is_there_a_trade-off_between_peak_performance_and_performance_breadth_across_temperatures_for_aerobic_scope_in_teleost_fishes_/3843624).

At the 'Review & submit' step, you must view the PDF proof of the manuscript before you will be able to submit the revision. Note: if any parts of the electronic submission form have not been completed, these will be noted by red message boxes - you will need to resolve these errors before you can submit the revision.

## Author's Response to Decision Letter for (RSOS-210791.R1)

See Appendix B.

## Decision letter (RSOS-210791.R2)

We hope you are keeping well at this difficult and unusual time. We continue to value your support of the journal in these challenging circumstances. If Royal Society Open Science can assist you at all, please don't hesitate to let us know at the email address below.

Dear Dr Lovecchio,

It is a pleasure to accept your manuscript entitled "Design of a custom-made device for real-time optical measurement of differential mineral concentrations in 3D scaffolds for bone tissue engineering" in its current form for publication in Royal Society Open Science. The comments of the reviewer(s) who reviewed your manuscript are included at the foot of this letter.

If you have not already done so, please ensure that you send to the editorial office an editable version of your accepted manuscript, and individual files for each figure and table included in your manuscript. You can send these in a zip folder if more convenient. Failure to provide these files may delay the processing of your proof.

Please remember to make any data sets or code libraries 'live' prior to publication, and update any links as needed when you receive a proof to check - for instance, from a private 'for review' URL to a publicly accessible 'for publication' URL. It is good practice to also add data sets, code and other digital materials to your reference list.

Our payments team will be in touch shortly if you are required to pay a fee for the publication of the paper (if you have any queries regarding fees, please see <https://royalsocietypublishing.org/rsos/charges> or contact [authorfees@royalsociety.org](mailto:authorfees@royalsociety.org)).

The proof of your paper will be available for review using the Royal Society online proofing system and you will receive details of how to access this in the near future from our production office ([openscience\\_proofs@royalsociety.org](mailto:openscience_proofs@royalsociety.org)). We aim to maintain rapid times to publication after acceptance of your manuscript and we would ask you to please contact both the production office and editorial office if you are likely to be away from e-mail contact to minimise delays to publication. If you are going to be away, please nominate a co-author (if available) to manage the proofing process, and ensure they are copied into your email to the journal.

Please see the Royal Society Publishing guidance on how you may share your accepted author manuscript at <https://royalsociety.org/journals/ethics-policies/media-embargo/>. After publication, some additional ways to effectively promote your article can also be found here <https://royalsociety.org/blog/2020/07/promoting-your-latest-paper-and-tracking-your-results/>.

Thank you for your fine contribution. On behalf of the Editors of Royal Society Open Science, we look forward to your continued contributions to the Journal.

Kind regards,  
Royal Society Open Science Editorial Office  
Royal Society Open Science  
[openscience@royalsociety.org](mailto:openscience@royalsociety.org)

on behalf of Dr Peter Munro (Associate Editor) and R. Kerry Rowe (Subject Editor)  
[openscience@royalsociety.org](mailto:openscience@royalsociety.org)

Follow Royal Society Publishing on Twitter: @RSocPublishing  
Follow Royal Society Publishing on Facebook:  
<https://www.facebook.com/RoyalSocietyPublishing.FanPage/>  
Read Royal Society Publishing's blog:  
<https://royalsociety.org/blog/blogsearchpage/?category=Publishing>

## Appendix A

Joseph Lovecchio  
Laboratory of Cellular and Molecular Engineering "Silvio Cavalcanti"  
Department of Electrical, Electronic and Information Engineering "Guglielmo Marconi" (DEI)  
University of Bologna, Via dell'università 50, 47522 Cesena (FC), Italy  
e-mail: joseph.lovecchio@unibo.it tel: +390547338953

To the kind attention of  
Royal Society Open Science

Dear Editor,

we thank you for considering the manuscript entitled "Design of a custom-made device for real-time optical measurement of differential mineral concentrations in 3D scaffolds for bone tissue engineering" by Joseph Lovecchio, Valentina Betti, Marilisa Cortesi, Enrico Ravagli, Stefano Severi, Emanuele Giordano, intended as a regular submission as a Research Article for Royal Society Open Science.

We appreciate the time you have dedicated to our paper and the valuable comments from the Reviewers.

We did our best to answer in detail to all the questions raised by the Reviewers and to reformat the manuscript accordingly.

Please find uploaded to Scholarone application:

- a .zip file (Lovecchio\_Betti\_2021\_RSOS\_(Rev)) containing a copy of the revised manuscript (new text: red, deleted text: black strikethrough);
- a .zip file (Lovecchio\_Betti\_2021\_RSOS\_(Final)) containing a copy of the 'clean' version of the new manuscript.

Point-by-point answers to the Reviewers' comments are presented in the following pages.

We hope that our careful consideration of the Reviewers' concerns - as far as possible within the time allotted to report our answers (deadline October 1st, 2021) - increased the value of our manuscript to the readership of Royal Society Open Science and thank you for the opportunity to consider its resubmitted version.

We are looking forward to hearing from you.

Yours sincerely,  
Dr. Joseph Lovecchio

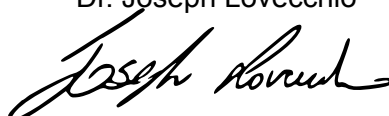

## #Reviewer 1

### Comments to the Author(s)

This study is potentially significant as it explores the reliability of “a miniaturized and inexpensive custom-made spectrometer device” for measuring differential amounts of a calcium salt in an alginate hydrogel. This system would enable a “real-time, in-line, in situ analysis,” that could be used in tissue engineering studies (e.g., non-destructive characterization of the mineral content in polymeric scaffolds, bioreactor systems, etc.). The following comments have been provided for the authors’ consideration and could improve the manuscript.

*We thank the Reviewer for the kind appreciation of our work and the specific comments to improve the manuscript.*

**1) Page 2: The introduction is very brief. Some background information on the current state of the art and a comparison with similar studies reported by others would be helpful to readers.**

*As requested, we added to the Introduction section some background information on the current state-of-the-art about measurement of bone mineral content/density. Dual-energy x-ray absorptiometry (DXA)-based assays in patients for clinical purposes are mentioned. X-ray  $\mu$ CT-based non-destructive techniques have also been reported. Both these approaches however look inappropriate (expensive and bulky) for cell laboratory TE applications.*

*The basis for our light spectroscopy-based proposed approach were mentioned in the manuscript. To the best of our knowledge, we did not retrieve in the literature other compact and cheap devices to compare with ours.*

**2) Page 3: The suppliers of all chemicals should be identified. This includes RPMI, used under “3D Alginate Hydrogel scaffolds”. Also, letters “A” and “T” in Eq. 1 should be defined.**

*We have amended the manuscript as requested.*

**3) Page 3: The information provided under “Custom-made spectrometer device development and measurements” may not be adequate for a reader to replicate the study and build the device. Additional details and a more descriptive image (Figure 1) would be necessary.**

*The information provided under “Custom-made spectrometer device development and measurements” has been reformulated in conjunction with providing a picture of the real device (new Figure 2) in order to support a reader willing to build the device and replicate the study.*

**4) Page 10 and Figure 8: According to the manuscript, the stability of the “measurement method is evidenced when the validated custom-made spectrometer is used to evaluate the differential amounts of calcium salt in the alginate hydrogel scaffolds at different days.” Unlike the previous results (Figures 3 – 7), Figure 8 only shows the results of the custom-made device. It would be desirable to see the results at the different time points coming from the commercial device.**

*We added in old Figure 8 (now Figure 9, left panel) the results collected with the commercial device at the different time points. Results from the custom-made device appear in the right panel of this same Figure.*

**5) Page 11: The manuscript shows a short paragraph at the end, summarizing the observations of this study. Nevertheless, it would be important to have distinct sections for the discussion and/or conclusions, including an overview of the limitations, future directions, and additional potential applications beyond the results shown in this study.**

*We added two new sections (i.e.: discussion and conclusion) to the manuscript. The conclusion section includes an overview of the limitations, future directions, and additional potential applications beyond the results shown in this study.*

**6) The manuscript does not show any image of the hydrogels prepared in this study (neither optical nor scanning electron microscopy).**

*A new Figure 1 shows an image of 3D hydrogel scaffolds at the three different CaCO<sub>3</sub> concentrations (20, 40, and 80 mM) evaluated in this study. Accordingly, the 3D alginate hydrogel scaffold paragraph was reformulated in the “Material and Methods” section, including a new Table (Table 1) detailing the reagent mix used to cast them.*

**7) Overall, the manuscript is short. Additional characterizations using a different technique to demonstrate a uniform distribution of the calcium salt within these hydrogels seem to be essential for this study.**

*In the section “Supplementary material” a new figure (S2) shows an image of Alizarin red-stained slices from hydrogel scaffold at different CaCO<sub>3</sub> concentrations (20, 40, and 80 mM) evaluated in this study.*



## #Reviewer 2

### Comments to the Author(s)

The article is well designed and written. Please make the following corrections before accepting

*We thank the Reviewer for the kind appreciation of our work and the specific comments to improve the manuscript.*

#### 1) Summarize the article abstract in one paragraph

*The abstract was amended as requested.*

2) Find out more about the calcium phosphate family. You can get help from the following sources: <https://doi.org/10.1016/j.bsecv.2020.05.001>, <https://doi.org/10.1016/j.bsecv.2017.05.001>

*The following reference has been added in a newly added Discussion section:*  
<https://doi.org/10.1016/j.bsecv.2017.05.001>

3) More details are needed about hydrogels and gels. You can get help from the following sources: <https://doi.org/10.1016/j.matchemphys.2019.122305>, <https://doi.org/10.1021/acsbiomaterials.9b01689>

*The following references have been added in a newly added Discussion section:*  
<https://doi.org/10.1016/j.matchemphys.2019.122305>  
<https://dx.doi.org/10.1021/acs.bioconjchem.0c00270>  
<https://doi.org/10.1021/acsbiomaterials.9b01689>

4) Explain Equation 1 further and clarify what each parameter specifies.

*We have amended the manuscript as requested.*

5) If possible, take a few microscopic images of the scaffolds and add them to the manuscript

*A new Figure 1 shows an image of 3D hydrogel scaffolds at the three different CaCO<sub>3</sub> concentrations (20, 40, and 80 mM) evaluated in this study. Accordingly, the 3D alginate hydrogel scaffold paragraph was reformulated in the “Material and Methods” section, including a new Table (Table 1) detailing the reagent mix used to cast them.*

*A new figure (S2) in the “Supplementary Material” sections shows an image of Alizarin red-stained slices from hydrogel scaffold at different CaCO<sub>3</sub> concentrations (20, 40, and 80 mM) evaluated in this study.*

**6) The number of references is too low, please add more studies**

*We have amended the manuscript as requested.*

## Appendix B

Joseph Lovecchio  
Laboratory of Cellular and Molecular Engineering "Silvio Cavalcanti"  
Department of Electrical, Electronic and Information Engineering "Guglielmo Marconi" (DEI)  
University of Bologna, Via dell'università 50, 47522 Cesena (FC), Italy  
e-mail: joseph.lovecchio@unibo.it tel: +390547338953

To the kind attention of  
Royal Society Open Science

Dear Editor,

we thank you for considering the manuscript entitled "Design of a custom-made device for real-time optical measurement of differential mineral concentrations in 3D scaffolds for bone tissue engineering" by Joseph Lovecchio, Valentina Betti, Marilisa Cortesi, Enrico Ravagli, Stefano Severi, Emanuele Giordano, intended as a regular submission as a Research Article for Royal Society Open Science.

We appreciate the time you have dedicated to our paper and the valuable comments from the Reviewers.

We did our best to answer in detail to all the questions raised by the Reviewers and to reformat the manuscript accordingly.

Please find uploaded to Scholarone application:

- a .zip file (Lovecchio\_Betti\_2021\_RSOS\_(Rev2)) containing a copy of the revised manuscript (new text: red, deleted text: black strikethrough);
- a .zip file (Lovecchio\_Betti\_2021\_RSOS\_(Final\_Rev2)) containing a copy of the 'clean' version of the new manuscript.

Point-by-point answers to the Reviewers' comments are presented in the following pages.

We hope that our careful consideration of the Reviewers' concerns - as far as possible within the time allotted to report our answers (deadline November 7th, 2021) - increased the value of our manuscript to the readership of Royal Society Open Science and thank you for the opportunity to consider its resubmitted version.

We are looking forward to hearing from you.

Yours sincerely,  
Dr. Joseph Lovecchio

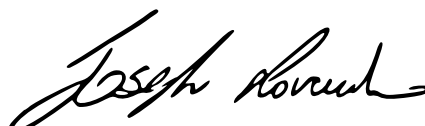

## #Reviewer 1

### Comments to the Author(s)

**The manuscript has been adequately revised to address the concerns raised by the reviewers. Nevertheless, the authors are encouraged to proof-read their revised manuscript before resubmission. Some corrections are necessary before consideration by the journal. Here are some examples:**

*We thank the Reviewer for the kind appreciation of our work and the specific comments to improve the manuscript.*

**1) Page 2: In the following sentence, “[Ref]” appears to be a place-holder for a missing reference number, or it is possibly a typographical error.**

**This test conveniently reports about bone mineral content (BMC) and density (BMD) in patients, although requiring dedicated expensive and bulky instruments [Ref] inappropriate for a cellular study in a laboratory.**

*We have amended the manuscript as requested.*

**2) Page 2: Likewise, it is unclear if “[Vanderoost 14]” in the following sentence is a reference citation, which seems to be in an unusual format:**

**Among those, X-ray uCT was demonstrated as a powerful non-destructive imaging technique to obtain, with the highest resolution, precise quantitative and qualitative information on the bone tissue microstructure again, without the need for conventional destructive methods [Vanderoost 14].**

*We have amended the manuscript as requested.*

**3) Table 1: The table caption should be placed above the table.**

*We have amended the manuscript as requested.*

**4) Figure 9: The caption does not clearly describe the two graphs. It is unclear which graph the caption is referring to. These graphs should contain labels (a, b) and a distinctive caption for each. According to the authors’ response to reviewers, one of the graphs is presenting the newly-added results, but the caption has not been updated accordingly. The response to reviewers states “We added in old Figure 8 (now Figure 9, left panel) the results collected with the commercial device at the different time points. Results from the custom-made device appear in the right panel of this same Figure.”**

*Figure 9 caption has been reworded to properly convey its meaning to the readers.*

**5) Page 11: The following sentence should be a part of the previous paragraph or the next paragraph. It is currently showing as a single-sentence paragraph. “A single wavelength (690nm) was identified aiming at simplify any subsequent analysis.” In addition, this sentence needs to be rephrased (“aiming at simplify” is unclear).**

*The mentioned sentence was reworded as: “The wavelength (690nm) with the highest similarity value was then used for further analysis”.*

**6) Page 12: The same issue can be seen under Conclusion. There are three single-sentenced paragraphs under this section.**

*We have compacted the Conclusion section as requested.*

**#Reviewer 2**

**Comments to the Author(s)**

**Accept.**

*We thank the Reviewer for the kind appreciation of our work.*
